# Supplementary material for: Proanthocyanidins Modulate Rumen Enzyme Activities and Protein Utilization In Vitro
Source: MDPI journal article supplement (doi:10.3390/molecules27185870), 2022-09-10
Supplement: s1 [file s1]

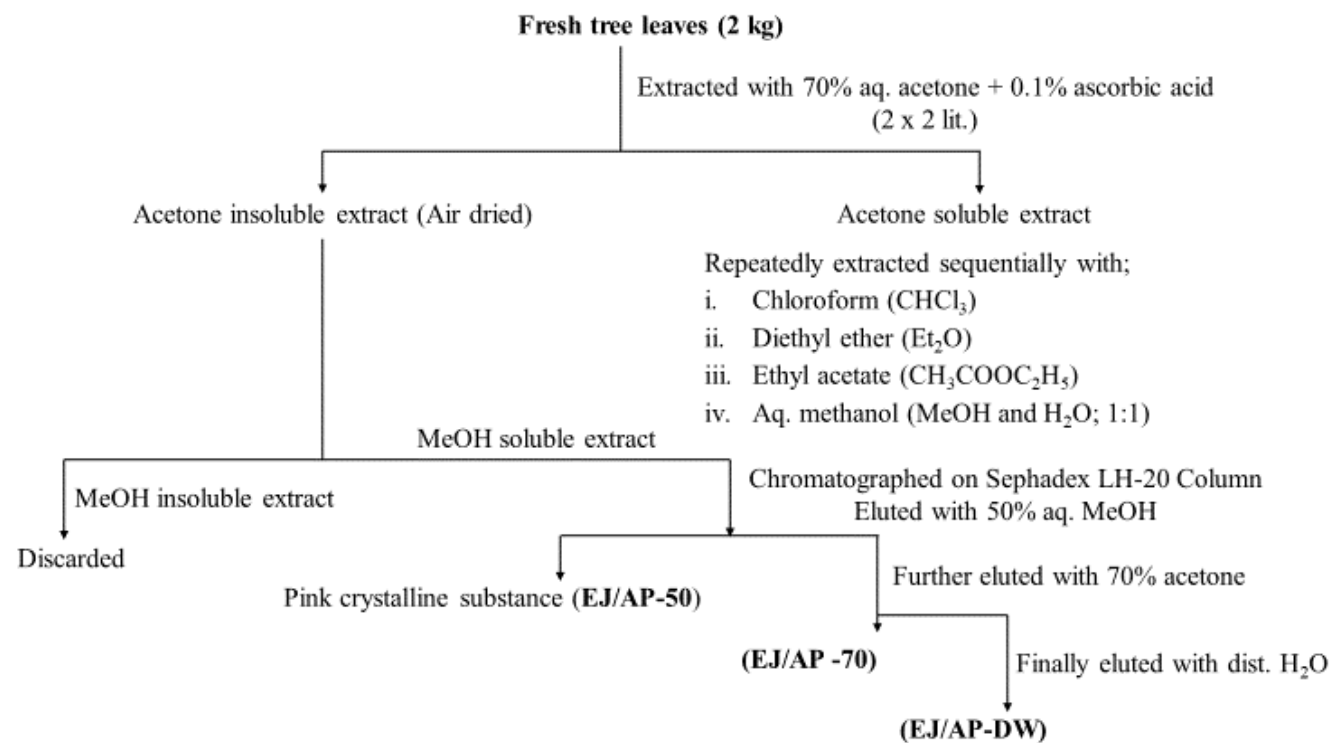

**Figure S1.** Schematic flowchart for extraction and isolation of proanthocyanidins from tree leaves

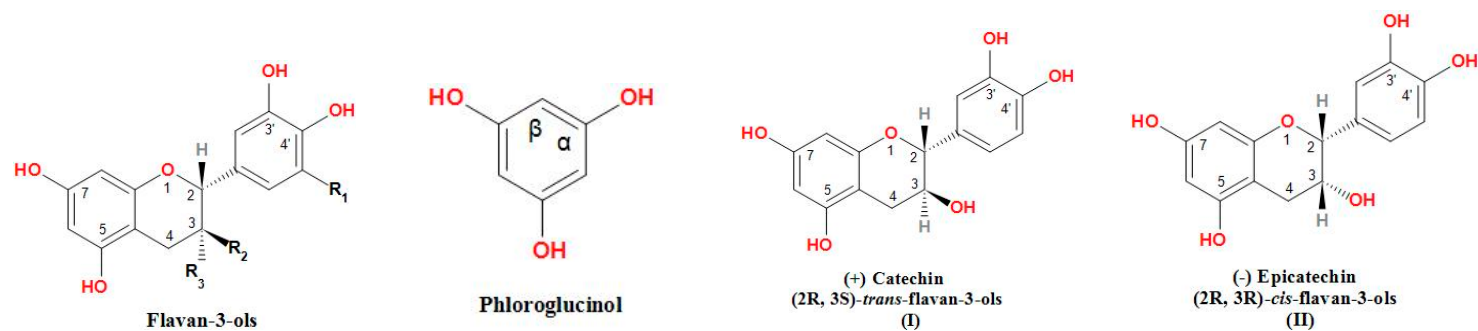

| Flavonoid            | R <sub>1</sub> | R <sub>2</sub> | R <sub>3</sub> |
|----------------------|----------------|----------------|----------------|
| (+)-Catechin         | H              | OH             | H              |
| (-)-Epicatechin      | H              | H              | OH             |
| (+)-Gallocatechin    | OH             | OH             | H              |
| (-)-Epigallocatechin | OH             | H              | OH             |

**Figure S2.** Chemical structure of the compounds investigated in the study
