# Supplementary material for: Proanthocyanidins Modulate Rumen Enzyme Activities and Protein Utilization In Vitro
Source: MDPI journal article supplement (doi:10.3390/molecules27185870), 2022-09-10
Supplement: s1 [file s1]

**Table S1.** Degree of polymerisation and unit and compositions of sub-units of PAs in extracted plant fractions

| Fractions | Total Monomer | Total adduct | Degree of polymerization | Extension unit (%) | Terminal unit (%) | Sub-unit ratio                 |
|-----------|---------------|--------------|--------------------------|--------------------|-------------------|--------------------------------|
| EJ-50     | 0.684         | 5.338        | 7.80                     | 89                 | 11                | Dp: Cy (66:34)                 |
| EJ-70     | 0.581         | 3.235        | 5.57                     | 85                 | 15                | Dp: Cy (60:40)                 |
| EJ-DW     | 1.342         | 6.87         | 5.12                     | 84                 | 16                | Dp: Cy: Pel (34:33:33)         |
| AP-50     | 1.692         | 6.445        | 3.81                     | 80                 | 20                | Dp: Cy: Pel: Mal (40:20:20:20) |
| AP-70     | 2.403         | 6.35         | 2.66                     | 73                 | 27                | Dp: Cy (60:40)                 |
| AP-DW     | 0.672         | 4.201        | 6.25                     | 84                 | 16                | Dp: Cy (60:40)                 |

AP-50, AP-70 and AP-DW: Extract eluted with 50% of MeOH, 70% acetone and with distilled water respectively from *A. pendula*. EJ-50, EJ-70 and EJ-DW: Extract eluted with 50% of MeOH, 70% of acetone and with distilled water respectively from *E. jambolana*, Dp: delphinidin, Cy: cyanidin, Pel: pelargonidin and Mal: malvidin
